# Supplementary material
Source: publisher figshare collection journal article supplement (https://karger.figshare.com/ndownloader/files/40849856)
Supplement: Supplementary file 1 [file 40849856]

Suppl. Table 1: BUN and creatinine assays.

|  | BUN [mg/dl] | | Creatinine [mg/dl] | |
| --- | --- | --- | --- | --- |
| Sample # | Baseline | POD-5 | Baseline | POD-5 |
| 8801-LepA | 15 | 29 | 1.17 | 1.81 |
| 8802-LepA | 18 | 20 | 1.28 | 1.66 |
| 8803-LepA | 14 | 17 | 1.27 | 1.7 |
| 8804-LepA | 15 | 19 | 1.4 | 1.95 |
| 8797-saline | 19 | 23 | 1.75 | 1.62 |
| 8798-saline | 17 | 21 | 1.49 | 1.59 |
| 8800-saline | 16 | 23 | 1.56 | 1.61 |
| 8805-saline | 28 | 27 | 1.33 | 1.96 |
